# Supplementary material
Source: PubMed Central journal article supplement (PMC4574258)
Supplement: supp_115.178491_178491SI.pdf [file supp_115.178491_178491SI.pdf]

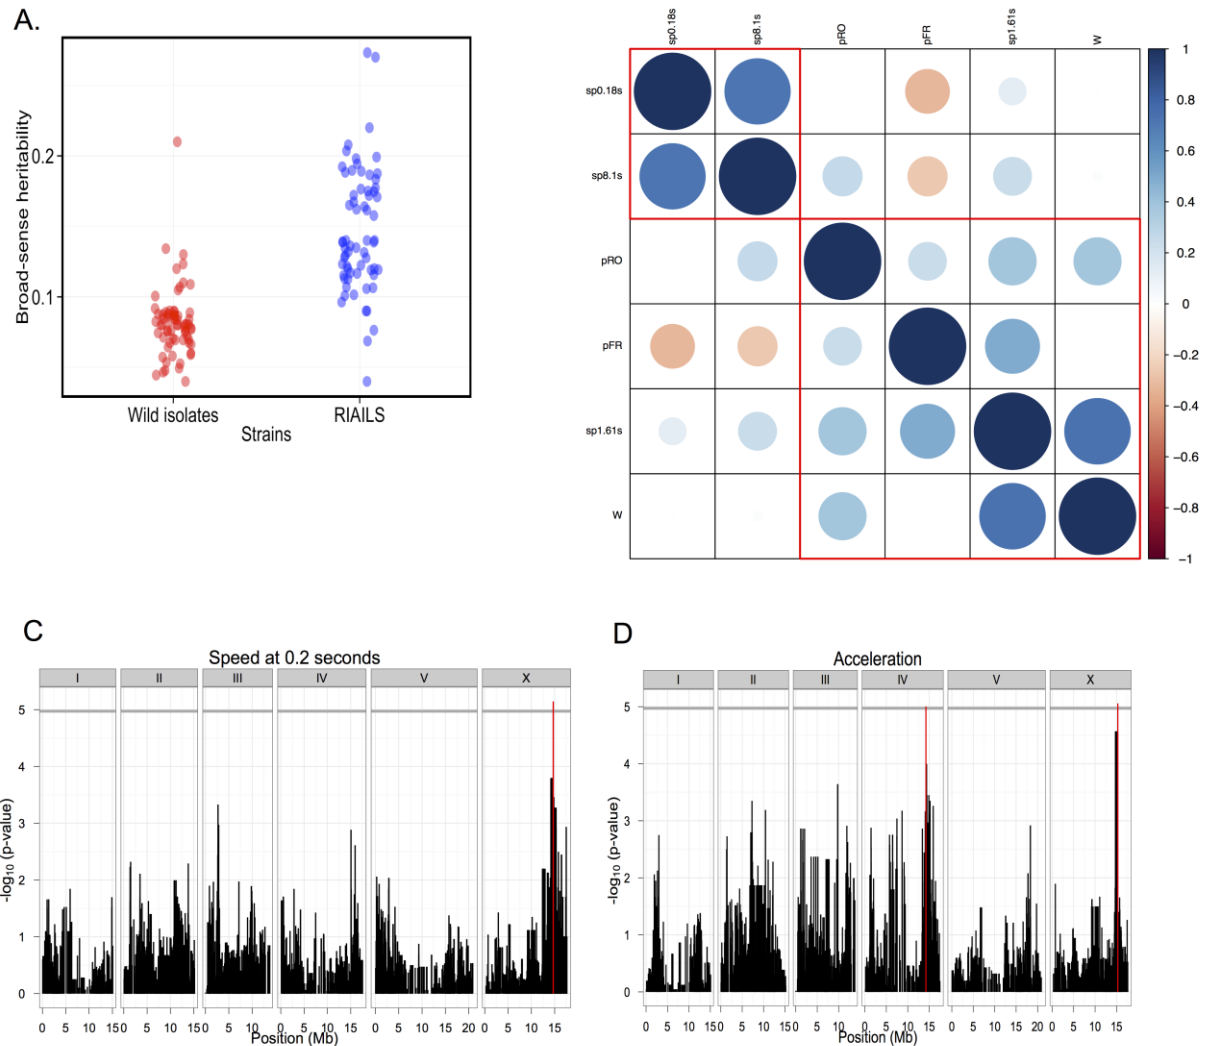

**Figure S1** **A)** Heritabilities of the sixty-six behavioral components in the wild isolate and the RIAIL population in response to  $\Delta T \sim 0.4^\circ\text{C}$ . **B)** Correlation of six representative components of the avoidance behavior among wild isolates. We analyzed 66 traits for pattern of correlation in the RIAIL population. For the traits that are speed at different time points there were two uncorrelated groups. The speeds between 0.72 and 1.96 seconds were uncorrelated to the speeds at the other time points which were strongly correlated. For simplicity, representative speeds are included in the plot: one at early time point (sp0.18s), one at late time point (sp8.1s) and one in the 0.72-1.96 range (sp1.61s). The behavioral components are: sp0.18s: speed at 0.18 seconds, sp1.61s: speed at 1.61 seconds, sp8.1s: speed at 8.1 seconds after start of the assay, pFR: probability of responding by reversals, W=number of body bends during reversals, pRO: probability of inducing omega turns. The magnitude of significant Pearson correlation coefficients ( $p < 0.01$ ) among these behavioral metrics are shown for wild isolates in circles. Absence of circles represents an absence of significant correlations. The phenotypes are hierarchically clustered and cut into two clusters bordered by red lines. **C,D)** Common naturally occurring variation on chromosomes IV and X contribute to natural variation in speed at early time points (C) and acceleration (D) during escape behavior. Plots of the results of genome wide association mapping for acceleration and speed at 0.2 seconds. Significantly associated markers are indicated by red lines.

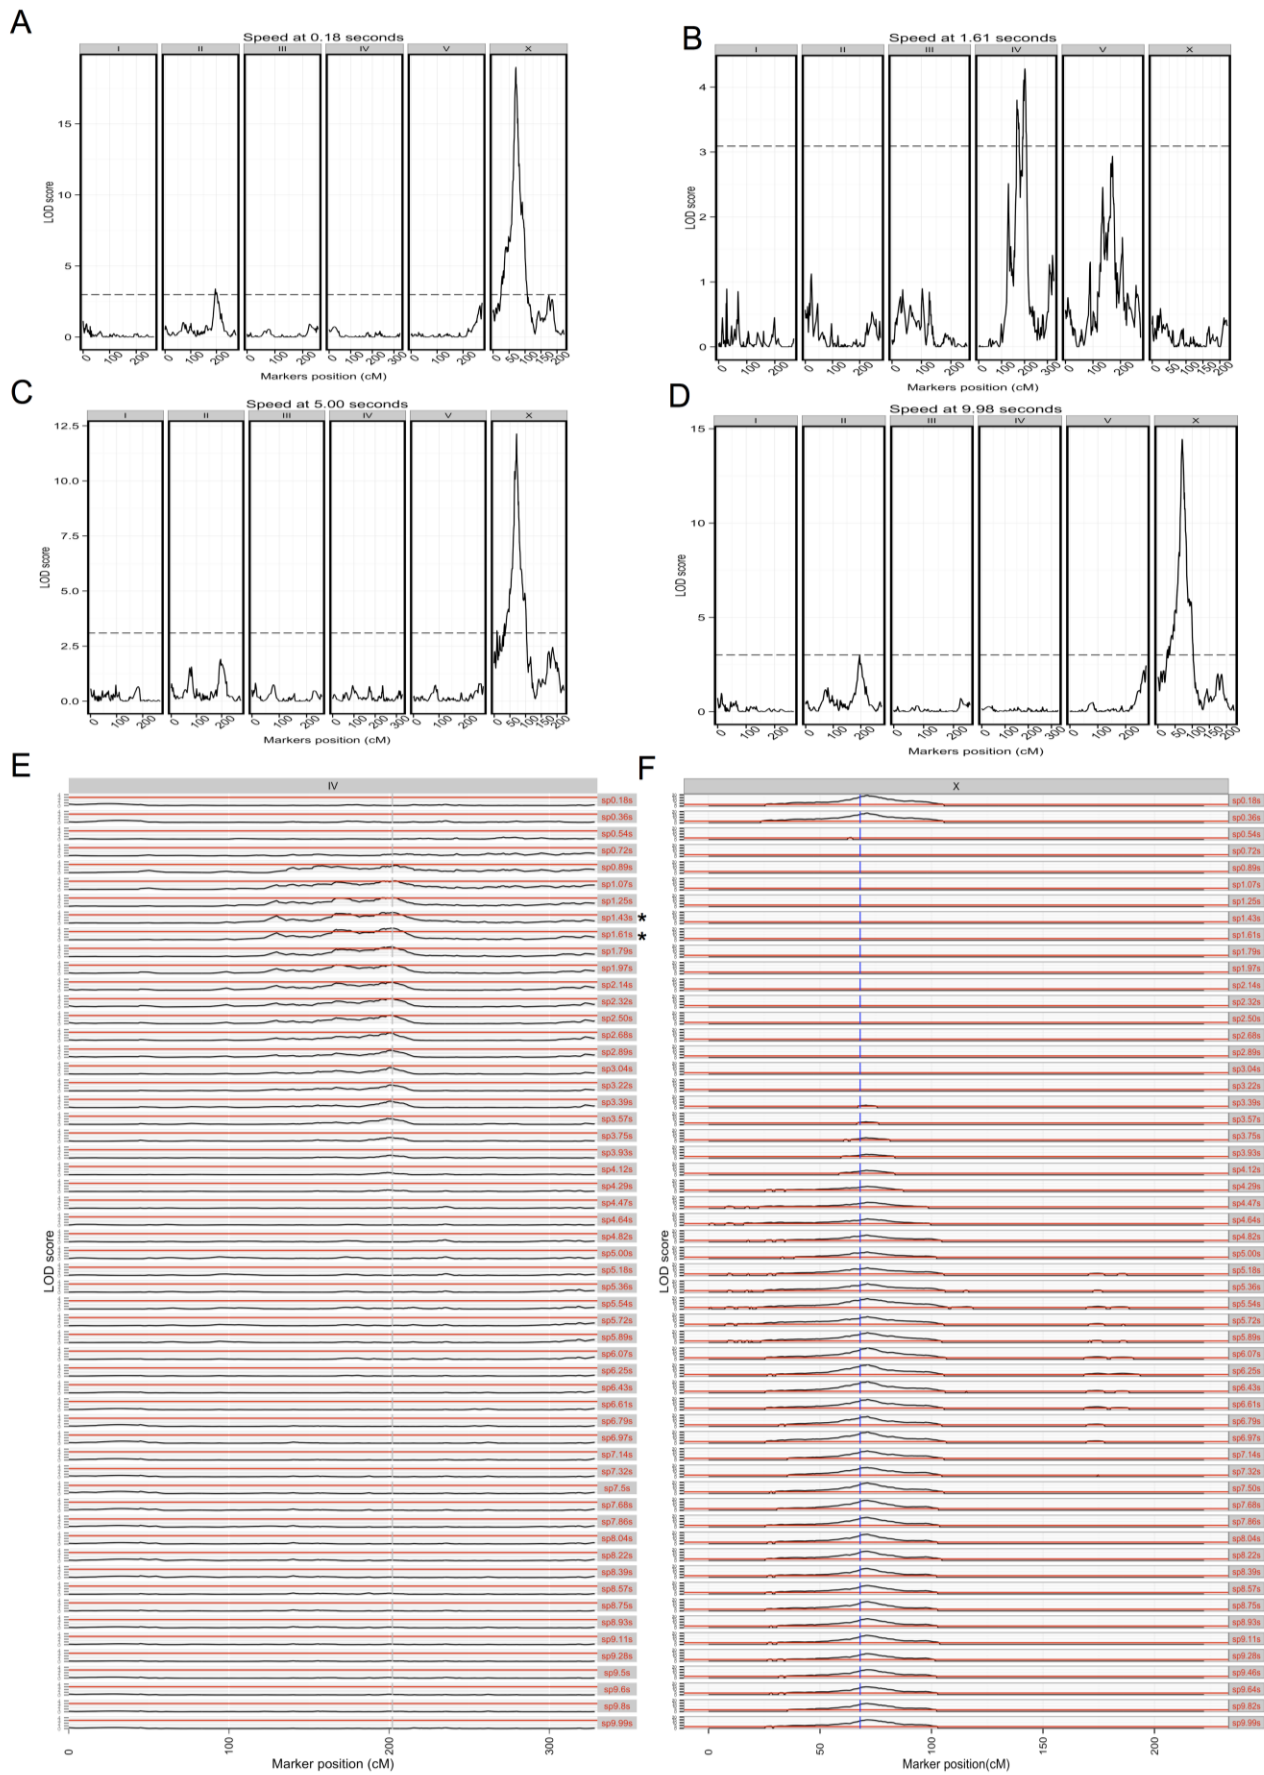

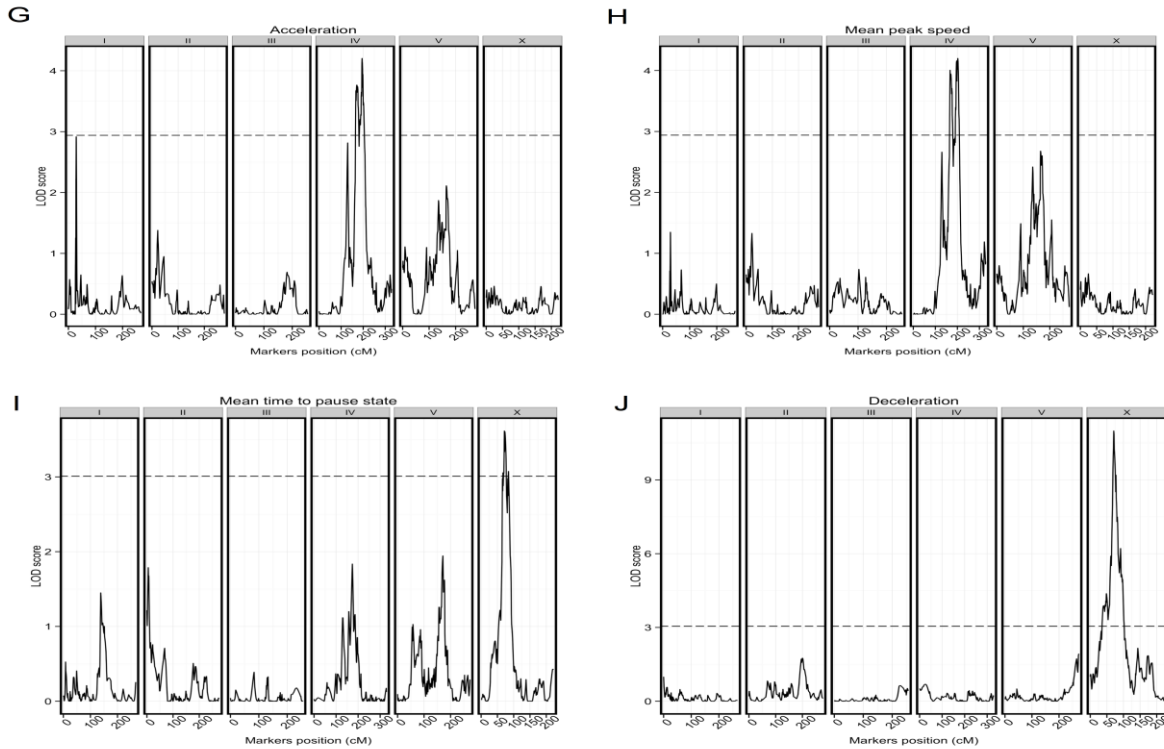

**Figure S2 Linkage analysis of various escape behavioral components related to centroid speed.**

Logarithm of the odds (LOD) scores plotted against marker positions. Each facet represents a chromosome depicted as I through V and X. The traits that are mapped are shown on the title of the corresponding figure. The horizontal dashed line represents the 5% genome-wide significance threshold obtained after 1000 permutations. A-D) LOD profiles for centroid speed at particular time points. E and F) LOD profiles for centroid speed at every 0.18 seconds for chromosomes IV (E) and X(F) respectively. Each facet represents the mapping results of speed at a single time point (depicted as sp\*.\*\*s in red). The red horizontal line represents the 5% genome-wide significance thresholds. The gray vertical line in (E) represent the peak marker position of the significant QTL. The blue vertical line in (F) represents the position of *npr-1* gene. Asterisks represent the speed at time points where a significant QTL was detected on chromosome IV. G-J) QTL analysis results of the speed related escape behavior components. The axes of the plots are same as in Fig S2A. The traits mapped are in the title of each plot.

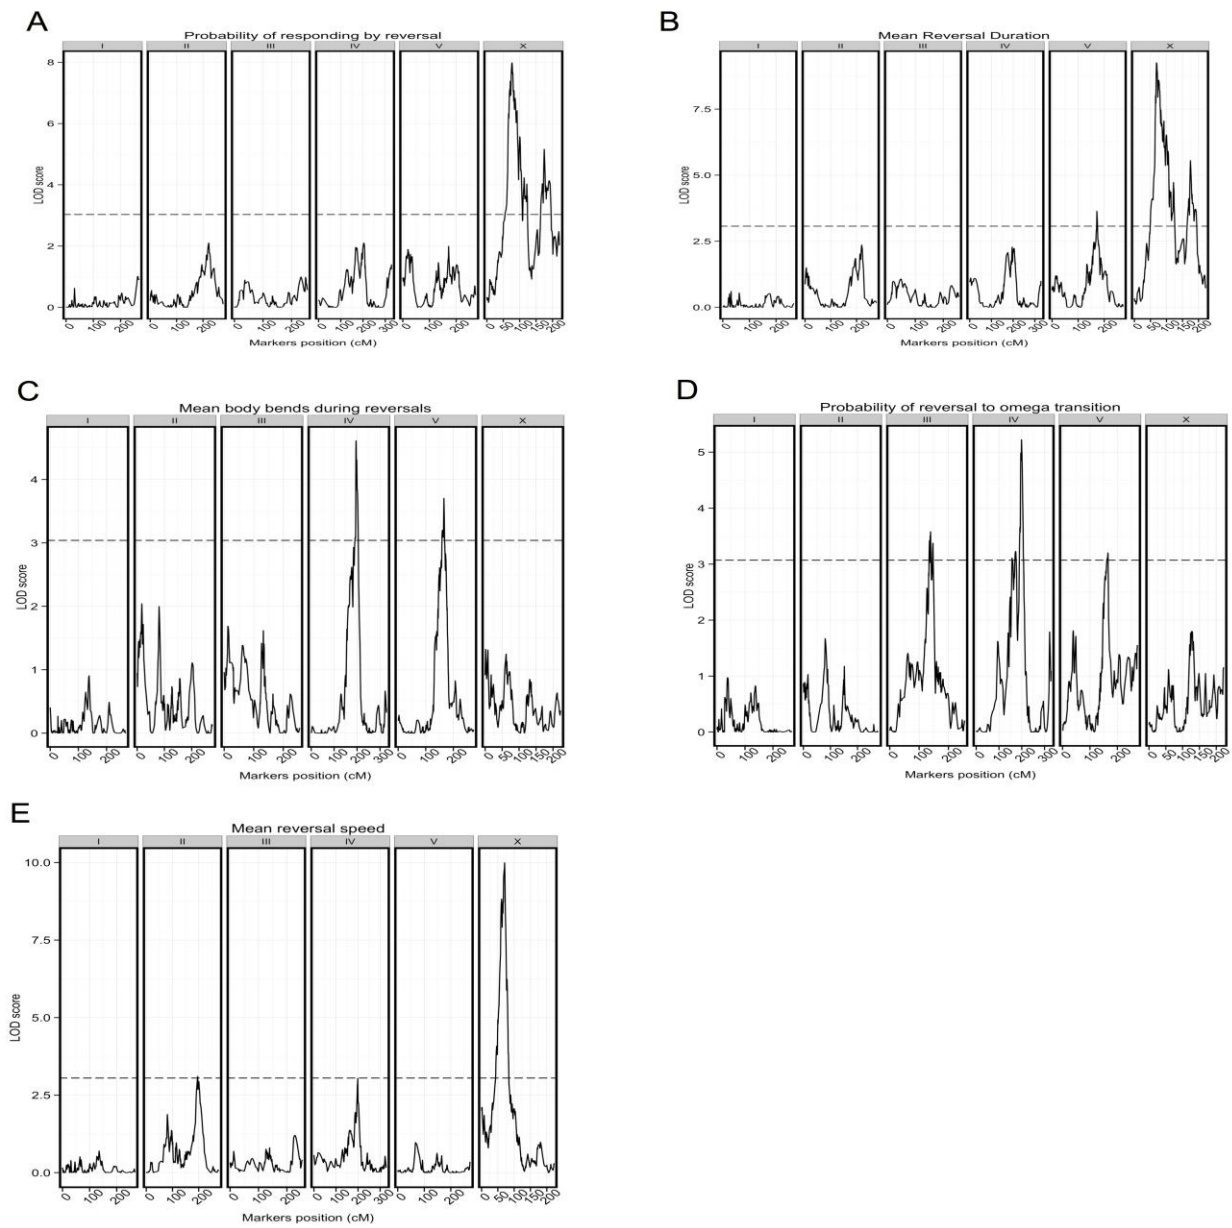

**Figure S3 Linkage analysis of various escape behavioral components related to reversals and omega turns.** The axes of the plots are same as in Fig S2A. The traits mapped are in the title of each plot (A-E).

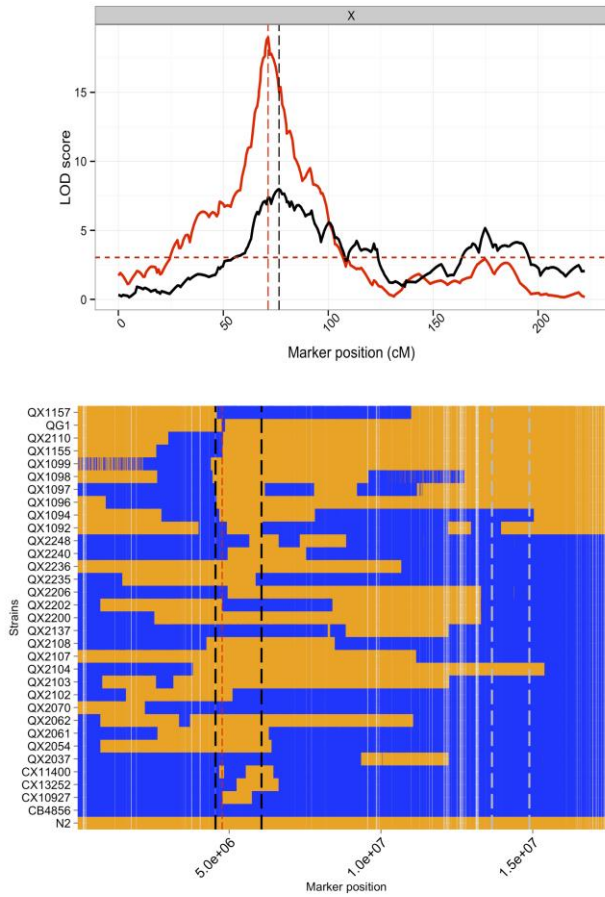

**Figure S4** Overlay of the speed (black) and the probability of responding by reversals (red) QTL on chromosome X. The horizontal dashed lines represent genomewide significance thresholds. The vertical dashed lines represent the peak of the respective QTL. **B**) The breakpoints on the X-chromosomes (X-axis:physical position in basepairs) of introgression lines (Y-axis) as determined by whole genome sequencing. Blue indicates Hawaii markers whereas orange indicates Bristol markers. The vertical red-dashed line represents the position of *npr-1*. The black and the white vertical dashed lines represent the proximal and distal QTL intervals respectively.

## Files S1-S5

Available for download at  
[www.genetics.org/lookup/suppl/doi:10.1534/genetics.115.178491/-/DC1](http://www.genetics.org/lookup/suppl/doi:10.1534/genetics.115.178491/-/DC1)

### Videos:

**File S1:** Avoidance behavior of Bristol animal in response to  $\Delta T \sim 0.4^\circ\text{C}$

**File S2:** Avoidance behavior of Hawaiian animal in response to  $\Delta T \sim 0.4^\circ\text{C}$

**File S3:** Avoidance behavior of Bristol animal in response to  $\Delta T \sim 9.1^\circ\text{C}$

**File S4:** Avoidance behavior of Hawaiian animal in response to  $\Delta T \sim 9.1^\circ\text{C}$

**File S5:** .xlsx file with genotype and phenotype details for strains used in the study and QTL information.

**Table S1** *npr-1* does not contribute to probability or responding by reversals

| Strain                                     | Fraction responding by reversal |                                                                                     |        |
|--------------------------------------------|---------------------------------|-------------------------------------------------------------------------------------|--------|
| Bristol                                    | 0.9 (n=154)                     |  | A<br>X |
| Hawaii                                     | 0.6 (n=149)                     |  | A<br>X |
| N2 male x CB4856 herm                      | 0.5 (n=34)                      |  | A<br>X |
| CB4856 male x N2 herm                      | 0.4 (n=29)                      |  | A<br>X |
| <i>npr-1(ad609)</i>                        | 0.9 (n=21)                      |  | A<br>X |
| QG1 (N2 > CB4856, <i>npr-1 CB4856</i> )    | 1.0 (n=29)                      |  | A<br>X |
| <i>kyIR9</i> (N2>CB4856, <i>N2 npr-1</i> ) | 0.5 (n=30)                      |  | A<br>X |

**Table S2 ANOVA results: Effects of genetic background, *npr-1* and distal QTL on chromosome X (QTL\_Xb) on speed.**

|            | Df | Sum Sq | Mean Sq | F value | Pr(>F) |
|------------|----|--------|---------|---------|--------|
| npr1       | 1  | 12.86  | 12.86   | 10.04   | 0.0039 |
| bkg        | 1  | 0.06   | 0.06    | 0.05    | 0.8248 |
| QTLXb      | 1  | 0.00   | 0.00    | 0.00    | 0.9768 |
| bkg:QTLXb  | 1  | 0.22   | 0.22    | 0.17    | 0.6835 |
| npr1:QTLXb | 1  | 0.17   | 0.17    | 0.14    | 0.7154 |
| npr1:bkg   | 1  | 0.01   | 0.01    | 0.01    | 0.9425 |
| Residuals  | 26 | 33.30  | 1.28    |         |        |

ANOVA Model with Predictors: Background,  
npr-1, QTLXb and their interactions



**Table S3 ANOVA results: Effects of genetic background, *npr-1* and distal QTL on chromosome X (QTL\_Xb) on probability of responding by reversals**

|            | Df | Sum Sq | Mean Sq | F value | Pr(>F) |
|------------|----|--------|---------|---------|--------|
| npr1       | 1  | 0.01   | 0.01    | 0.34    | 0.5633 |
| bkg        | 1  | 0.30   | 0.30    | 16.44   | 0.0004 |
| QTLXb      | 1  | 0.18   | 0.18    | 10.10   | 0.0038 |
| bkg:QTLXb  | 1  | 0.00   | 0.00    | 0.05    | 0.8186 |
| npr1:QTLXb | 1  | 0.00   | 0.00    | 0.22    | 0.6444 |
| npr1:bkg   | 1  | 0.01   | 0.01    | 0.57    | 0.4563 |
| Residuals  | 26 | 0.47   | 0.02    |         |        |

ANOVA Model with Predictors: Background,  
npr-1,QTLXb and their interactions

**Table S4 Summary of multiple QTL analysis of variation in probability of responding by reversals**

|                | <b>df</b> | <b>Type III SS</b> | <b>LOD</b> | <b>% var</b> | <b>F value</b> | <b>Pvalue(Chi2)</b> | <b>Pvalue(F)</b> |
|----------------|-----------|--------------------|------------|--------------|----------------|---------------------|------------------|
| X@76.6         | 2.0000    | 0.7496             | 6.7660     | 17.6137      | 16.9716        | 0.0000              | 0.0000           |
| X@190.0        | 2.0000    | 0.3015             | 2.9079     | 7.0859       | 6.8276         | 0.0012              | 0.0015           |
| X@76.6:X@190.0 | 1.0000    | 0.0595             | 0.5965     | 1.3980       | 2.6940         | 0.0974              | 0.1031           |

Summary of Multiple QTL Model with Reversal Response Probability

**Table S5 Summary of multiple QTL analysis of variation in mean reversal duration**

|                        | <b>df</b> | <b>Type III SS</b> | <b>LOD</b> | <b>% var</b> | <b>F value</b> | <b>Pvalue(Chi2)</b> | <b>Pvalue(F)</b> |
|------------------------|-----------|--------------------|------------|--------------|----------------|---------------------|------------------|
| V@171.7                | 4.0000    | 5828.0643          | 2.5009     | 5.2248       | 2.8288         | 0.0213              | 0.0273           |
| X@69.0                 | 4.0000    | 16689.1963         | 6.6687     | 14.9616      | 8.1005         | 0.0000              | 0.0000           |
| X@174.7                | 4.0000    | 6758.1974          | 2.8815     | 6.0586       | 3.2803         | 0.0100              | 0.0134           |
| V@171.7:X@69.0         | 2.0000    | 331.6153           | 0.1480     | 0.2973       | 0.3219         | 0.7111              | 0.7253           |
| V@171.7:X@174.7        | 2.0000    | 315.6435           | 0.1409     | 0.2830       | 0.3064         | 0.7229              | 0.7366           |
| X@69.0:X@174.7         | 2.0000    | 1240.6088          | 0.5501     | 1.1122       | 1.2043         | 0.2817              | 0.3032           |
| V@171.7:X@69.0:X@174.7 | 1.0000    | 52.7602            | 0.0236     | 0.0473       | 0.1024         | 0.7416              | 0.7494           |

Summary of Multiple QTL Model with Mean Reversal Duration

**Table S6 Summary of multiple QTL analysis of variation in probability of responding by omega turns.**

|                            | df     | Type III SS | LOD    | % var   | F value | Pvalue(Chi2) | Pvalue(F) |
|----------------------------|--------|-------------|--------|---------|---------|--------------|-----------|
| III@140.0                  | 4.0000 | 0.5186      | 4.9341 | 11.8678 | 5.8171  | 0.0001       | 0.0002    |
| IV@199.0                   | 4.0000 | 0.5362      | 5.0879 | 12.2701 | 6.0143  | 0.0001       | 0.0002    |
| V@164.0                    | 4.0000 | 0.3403      | 3.3276 | 7.7872  | 3.8169  | 0.0041       | 0.0057    |
| III@140.0:IV@199.0         | 2.0000 | 0.0095      | 0.0986 | 0.2185  | 0.2142  | 0.7969       | 0.8074    |
| III@140.0:V@164.0          | 2.0000 | 0.1041      | 1.0581 | 2.3831  | 2.3362  | 0.0875       | 0.1007    |
| IV@199.0:V@164.0           | 2.0000 | 0.0293      | 0.3015 | 0.6705  | 0.6573  | 0.4994       | 0.5199    |
| III@140.0:IV@199.0:V@164.0 | 1.0000 | 0.0038      | 0.0389 | 0.0862  | 0.1690  | 0.6720       | 0.6817    |

Summary of Multiple QTL Model with Reversal to Omega transition Probability

**Table S7 Summary of multiple QTL analysis of variation in number of body bends during reversal.**

|                  | <b>df</b> | <b>Type III SS</b> | <b>LOD</b> | <b>%var</b> | <b>F value</b> | <b>Pvalue(Chi2)</b> | <b>Pvalue(F)</b> |
|------------------|-----------|--------------------|------------|-------------|----------------|---------------------|------------------|
| IV@195.6         | 2.0000    | 5.6736             | 3.5485     | 9.8662      | 8.4226         | 0.0003              | 0.0004           |
| V@165.8          | 2.0000    | 4.1708             | 2.6487     | 7.2529      | 6.1917         | 0.0022              | 0.0027           |
| IV@195.6:V@165.8 | 1.0000    | 0.0047             | 0.0031     | 0.0081      | 0.0139         | 0.9047              | 0.9063           |

Summary of Multiple QTL Model with Mean number of body bends during reversals
