# Supplementary material
Source: PubMed Central journal article supplement (PMC4574258)
Supplement: supp_115.178491_FigureS3.pdf [file supp_115.178491_FigureS3.pdf]

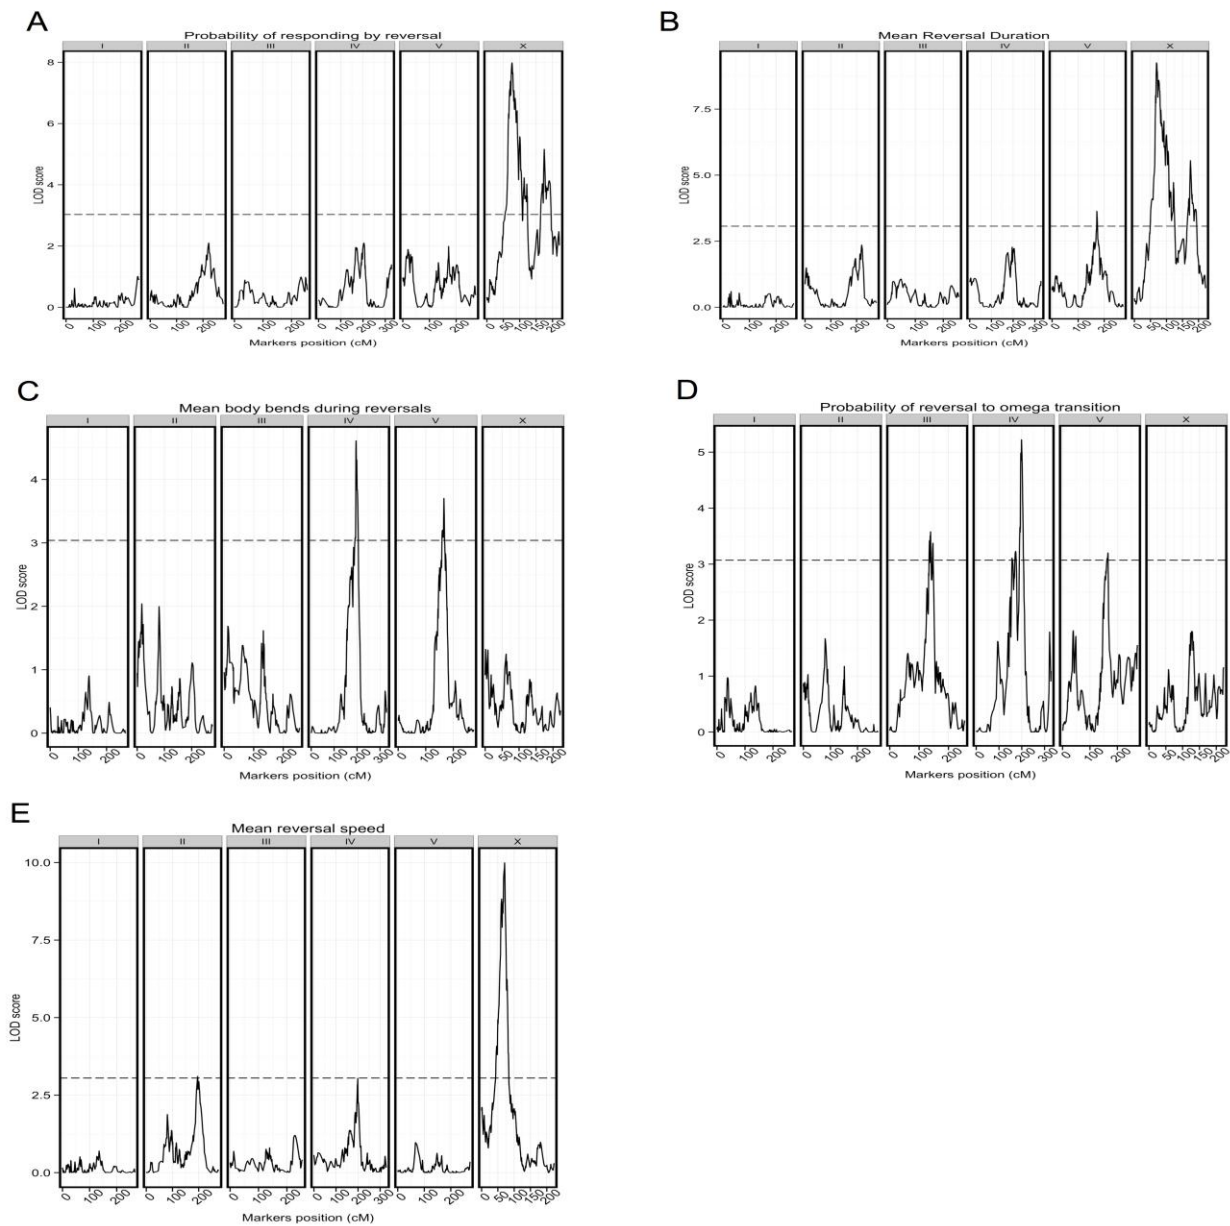

**Figure S3 Linkage analysis of various escape behavioral components related to reversals and omega turns.** The axes of the plots are same as in Fig S2A. The traits mapped are in the title of each plot (A-E).
