# Supplementary material
Source: PubMed Central journal article supplement (PMC4574258)
Supplement: supp_115.178491_TableS1.pdf [file supp_115.178491_TableS1.pdf]

**Table S1** *npr-1* does not contribute to probability or responding by reversals

| Strain                                     | Fraction responding by reversal                                                                        |
|--------------------------------------------|--------------------------------------------------------------------------------------------------------|
| Bristol                                    | 0.9 (n=154)  A<br>X |
| Hawaii                                     | 0.6 (n=149)  A<br>X |
| N2 male x CB4856 herm                      | 0.5 (n=34)  A<br>X  |
| CB4856 male x N2 herm                      | 0.4 (n=29)  A<br>X  |
| <i>npr-1(ad609)</i>                        | 0.9 (n=21)  A<br>X  |
| QG1 (N2 > CB4856, <i>npr-1 CB4856</i> )    | 1.0 (n=29)  A<br>X  |
| <i>kyIR9</i> (N2>CB4856, <i>N2 npr-1</i> ) | 0.5 (n=30)  A<br>X  |
