# Supplementary material
Source: PubMed Central journal article supplement (PMC4574258)
Supplement: supp_115.178491_TableS2.pdf [file supp_115.178491_TableS2.pdf]

**Table S2 ANOVA results: Effects of genetic background, *npr-1* and distal QTL on chromosome X (QTL\_Xb) on speed.**

|            | <b>Df</b> | <b>Sum Sq</b> | <b>Mean Sq</b> | <b>F value</b> | <b>Pr(&gt;F)</b> |
|------------|-----------|---------------|----------------|----------------|------------------|
| npr1       | 1         | 12.86         | 12.86          | 10.04          | 0.0039           |
| bkg        | 1         | 0.06          | 0.06           | 0.05           | 0.8248           |
| QTLXb      | 1         | 0.00          | 0.00           | 0.00           | 0.9768           |
| bkg:QTLXb  | 1         | 0.22          | 0.22           | 0.17           | 0.6835           |
| npr1:QTLXb | 1         | 0.17          | 0.17           | 0.14           | 0.7154           |
| npr1:bkg   | 1         | 0.01          | 0.01           | 0.01           | 0.9425           |
| Residuals  | 26        | 33.30         | 1.28           |                |                  |

ANOVA Model with Predictors: Background,  
npr-1, QTLXb and their interactions
