# Supplementary material
Source: PubMed Central journal article supplement (PMC4574258)
Supplement: supp_115.178491_TableS3.pdf [file supp_115.178491_TableS3.pdf]

**Table S3 ANOVA results: Effects of genetic background, *npr-1* and distal QTL on chromosome X (QTL\_Xb) on probability of responding by reversals**

|            | <b>Df</b> | <b>Sum Sq</b> | <b>Mean Sq</b> | <b>F value</b> | <b>Pr(&gt;F)</b> |
|------------|-----------|---------------|----------------|----------------|------------------|
| npr1       | 1         | 0.01          | 0.01           | 0.34           | 0.5633           |
| bkg        | 1         | 0.30          | 0.30           | 16.44          | 0.0004           |
| QTLXb      | 1         | 0.18          | 0.18           | 10.10          | 0.0038           |
| bkg:QTLXb  | 1         | 0.00          | 0.00           | 0.05           | 0.8186           |
| npr1:QTLXb | 1         | 0.00          | 0.00           | 0.22           | 0.6444           |
| npr1:bkg   | 1         | 0.01          | 0.01           | 0.57           | 0.4563           |
| Residuals  | 26        | 0.47          | 0.02           |                |                  |

ANOVA Model with Predictors: Background,  
npr-1,QTLXb and their interactions
