# Supplementary material
Source: PubMed Central journal article supplement (PMC4574258)
Supplement: supp_115.178491_TableS4.pdf [file supp_115.178491_TableS4.pdf]

**Table S4 Summary of multiple QTL analysis of variation in probability of responding by reversals**

|                | <b>df</b> | <b>Type III SS</b> | <b>LOD</b> | <b>% var</b> | <b>F value</b> | <b>Pvalue(Chi2)</b> | <b>Pvalue(F)</b> |
|----------------|-----------|--------------------|------------|--------------|----------------|---------------------|------------------|
| X@76.6         | 2.0000    | 0.7496             | 6.7660     | 17.6137      | 16.9716        | 0.0000              | 0.0000           |
| X@190.0        | 2.0000    | 0.3015             | 2.9079     | 7.0859       | 6.8276         | 0.0012              | 0.0015           |
| X@76.6:X@190.0 | 1.0000    | 0.0595             | 0.5965     | 1.3980       | 2.6940         | 0.0974              | 0.1031           |

Summary of Multiple QTL Model with Reversal Response Probability
