# Supplementary material
Source: PubMed Central journal article supplement (PMC4574258)
Supplement: supp_115.178491_TableS5.pdf [file supp_115.178491_TableS5.pdf]

**Table S5 Summary of multiple QTL analysis of variation in mean reversal duration**

|                        | <b>df</b> | <b>Type III SS</b> | <b>LOD</b> | <b>% var</b> | <b>F value</b> | <b>Pvalue(Chi2)</b> | <b>Pvalue(F)</b> |
|------------------------|-----------|--------------------|------------|--------------|----------------|---------------------|------------------|
| V@171.7                | 4.0000    | 5828.0643          | 2.5009     | 5.2248       | 2.8288         | 0.0213              | 0.0273           |
| X@69.0                 | 4.0000    | 16689.1963         | 6.6687     | 14.9616      | 8.1005         | 0.0000              | 0.0000           |
| X@174.7                | 4.0000    | 6758.1974          | 2.8815     | 6.0586       | 3.2803         | 0.0100              | 0.0134           |
| V@171.7:X@69.0         | 2.0000    | 331.6153           | 0.1480     | 0.2973       | 0.3219         | 0.7111              | 0.7253           |
| V@171.7:X@174.7        | 2.0000    | 315.6435           | 0.1409     | 0.2830       | 0.3064         | 0.7229              | 0.7366           |
| X@69.0:X@174.7         | 2.0000    | 1240.6088          | 0.5501     | 1.1122       | 1.2043         | 0.2817              | 0.3032           |
| V@171.7:X@69.0:X@174.7 | 1.0000    | 52.7602            | 0.0236     | 0.0473       | 0.1024         | 0.7416              | 0.7494           |

Summary of Multiple QTL Model with Mean Reversal Duration
