# Supplementary material
Source: PubMed Central journal article supplement (PMC4574258)
Supplement: supp_115.178491_TableS6.pdf [file supp_115.178491_TableS6.pdf]

**Table S6 Summary of multiple QTL analysis of variation in probability of responding by omega turns.**

|                            | df     | Type III SS | LOD    | % var   | F value | Pvalue(Chi2) | Pvalue(F) |
|----------------------------|--------|-------------|--------|---------|---------|--------------|-----------|
| III@140.0                  | 4.0000 | 0.5186      | 4.9341 | 11.8678 | 5.8171  | 0.0001       | 0.0002    |
| IV@199.0                   | 4.0000 | 0.5362      | 5.0879 | 12.2701 | 6.0143  | 0.0001       | 0.0002    |
| V@164.0                    | 4.0000 | 0.3403      | 3.3276 | 7.7872  | 3.8169  | 0.0041       | 0.0057    |
| III@140.0:IV@199.0         | 2.0000 | 0.0095      | 0.0986 | 0.2185  | 0.2142  | 0.7969       | 0.8074    |
| III@140.0:V@164.0          | 2.0000 | 0.1041      | 1.0581 | 2.3831  | 2.3362  | 0.0875       | 0.1007    |
| IV@199.0:V@164.0           | 2.0000 | 0.0293      | 0.3015 | 0.6705  | 0.6573  | 0.4994       | 0.5199    |
| III@140.0:IV@199.0:V@164.0 | 1.0000 | 0.0038      | 0.0389 | 0.0862  | 0.1690  | 0.6720       | 0.6817    |

Summary of Multiple QTL Model with Reversal to Omega transition Probability
