# Supplementary material
Source: PubMed Central journal article supplement (PMC4574258)
Supplement: supp_115.178491_TableS7.pdf [file supp_115.178491_TableS7.pdf]

**Table S7 Summary of multiple QTL analysis of variation in number of body bends during reversal.**

|                  | <b>df</b> | <b>Type III SS</b> | <b>LOD</b> | <b>%var</b> | <b>F value</b> | <b>Pvalue(Chi2)</b> | <b>Pvalue(F)</b> |
|------------------|-----------|--------------------|------------|-------------|----------------|---------------------|------------------|
| IV@195.6         | 2.0000    | 5.6736             | 3.5485     | 9.8662      | 8.4226         | 0.0003              | 0.0004           |
| V@165.8          | 2.0000    | 4.1708             | 2.6487     | 7.2529      | 6.1917         | 0.0022              | 0.0027           |
| IV@195.6:V@165.8 | 1.0000    | 0.0047             | 0.0031     | 0.0081      | 0.0139         | 0.9047              | 0.9063           |

Summary of Multiple QTL Model with Mean number of body bends during reversals
